# Supplementary material for: Organic semiconductor perylenetetracarboxylic diimide (PTCDI) electrodes for electrocatalytic reduction of oxygen to hydrogen peroxide
Source: Royal Society of Chemistry journal article supplement (doi:10.1039/c7cc08471d), 2018-01-01
Supplement: c7cc08471d1.pdf [file c7cc08471d1.pdf]

**ESI for:**

**Organic semiconductor Perylenetetracarboxylic diimide (PTCDI) electrodes for electrocatalytic reduction of oxygen to hydrogen peroxide**

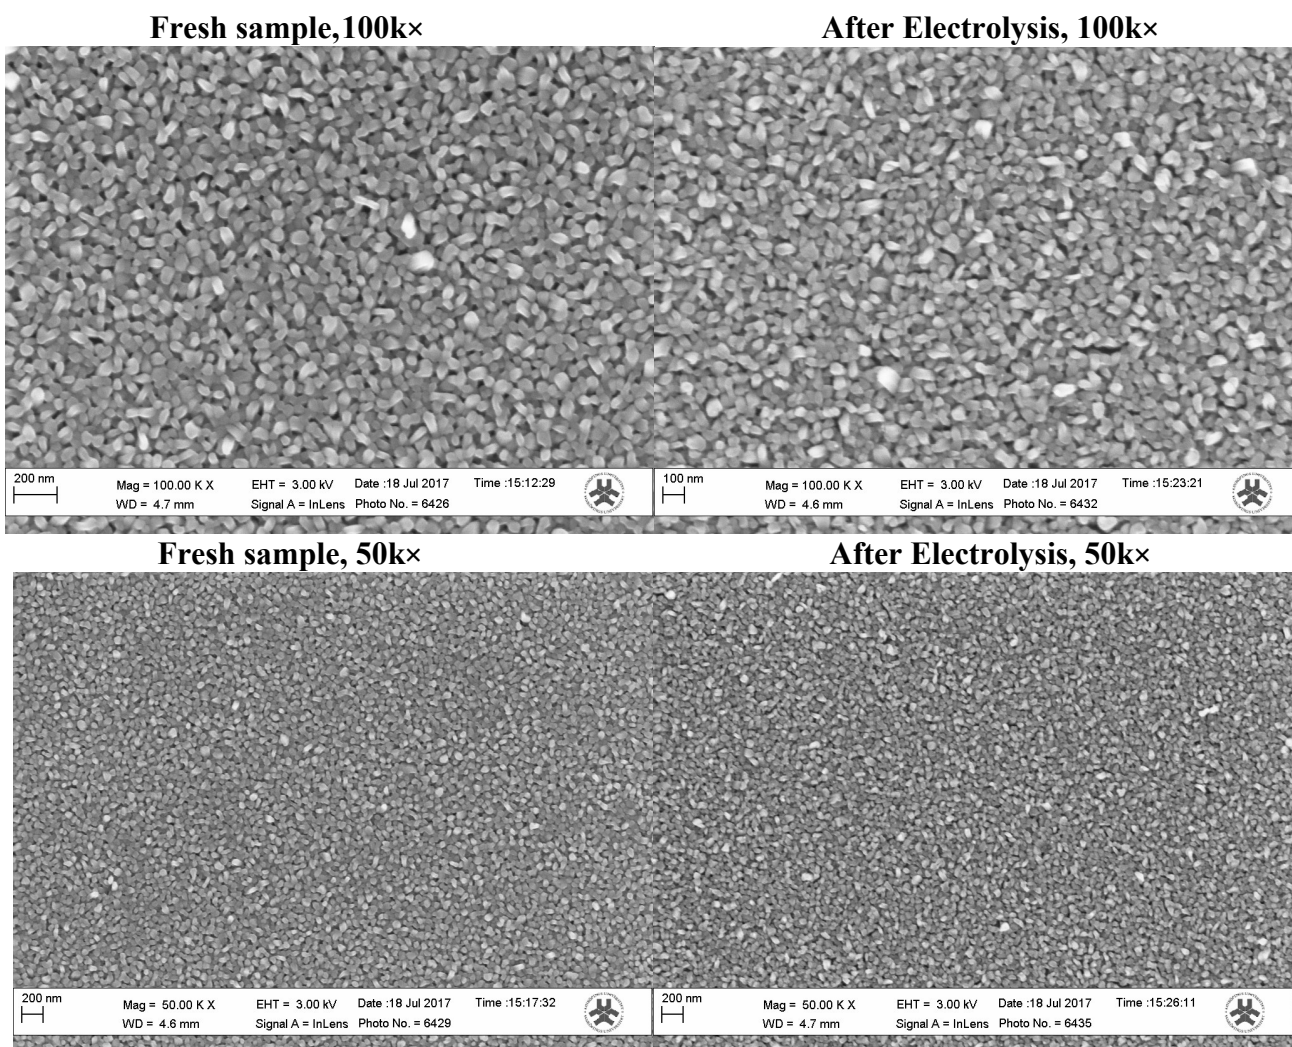

**Fig. S1.** SEM images of PTCDI layers (100 nm thickness) on gold electrodes. Gold with a thickness of 50 nm was evaporated, using a 2-nm sticking layer of chromium, onto cleaned Si wafers with 1  $\mu\text{m}$  of thermal oxide. Here the same electrode is measured before and after running in the oxygen-to-peroxide galvanostatic electrolysis experiment with a current density of 0.5  $\text{mA}/\text{cm}^2$  for 100 hours. No obvious morphological changes were visible, evidencing stability of the PTCDI layers.

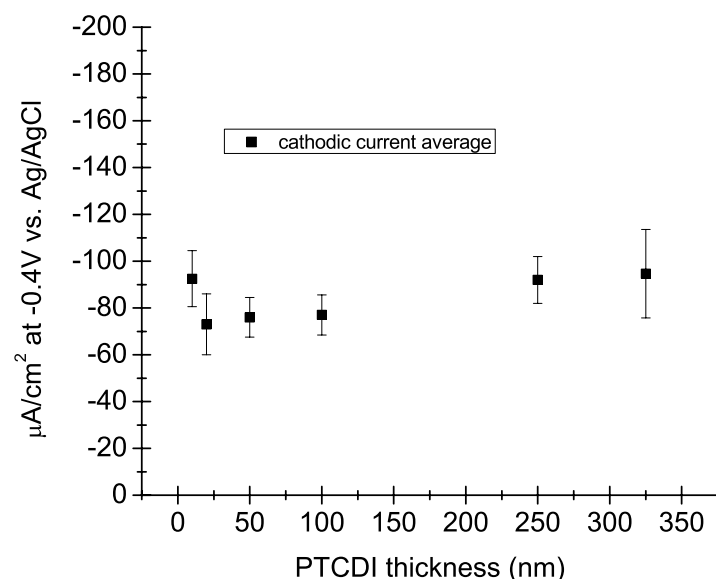

**Fig. S2.** Average cathodic current density at -400 mV versus Ag/AgCl during CV of PTCDI in pH 1 electrolyte (H<sub>2</sub>SO<sub>4</sub>) under ambient conditions, for samples of varying PTCDI thickness. Error bars represent one standard deviation.

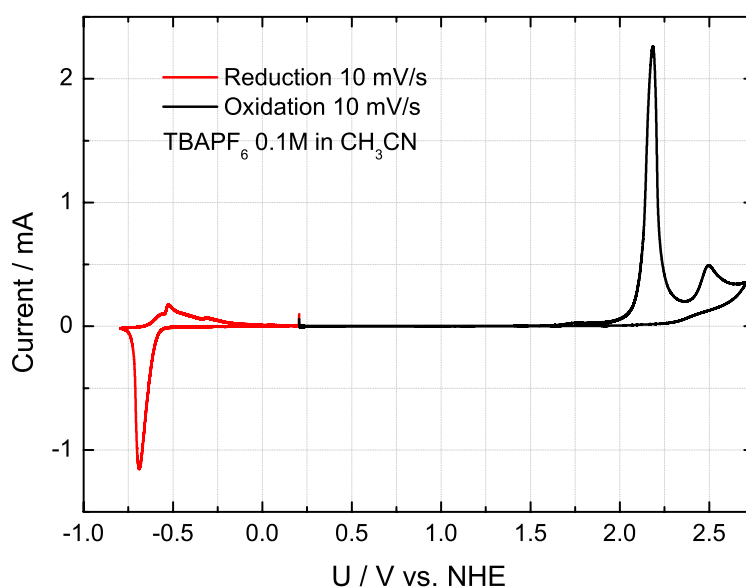

**Fig. S3.** CV of PTCDI/Au in 0.1M TBAPF<sub>6</sub>/CH<sub>3</sub>CN, 10 mV/s scan rate.

In order to estimate the HOMO and LUMO energy levels (in other words, valence and conduction band edges, respectively) of PTCDI we performed cyclic voltammetry measurements on Au/PTCDI in oxygen and water-free conditions using 0.1M tetrabutylammonium tetrafluorophosphate in CH<sub>3</sub>CN in an N<sub>2</sub>-filled glove box. Scan rate 10 mV/s. Reduction and oxidation scans were recorded separately on fresh samples.

Frontier molecular orbital energy level estimations were calculated according to formula given by Baran *et al.*, *Chem. Mater.* 2010, 22, pp.2978-2987, are HOMO: -6.72 eV and LUMO: -3.9 eV respectively, and the electrochemical band gap  $E_g$  from CV is 2.82 eV.

$$E_{\text{HOMO}} = -(E_{\text{onset, ox vs. NHE}} + 4.75)(\text{eV}); E_{\text{onset, ox vs. NHE}} = 1.97 \text{ V}; E_{\text{HOMO}} = -6.72 \text{ eV}$$

$$E_{\text{LUMO}} = -(E_{\text{onset, red vs. NHE}} + 4.75)(\text{eV}); E_{\text{onset, red vs. NHE}} = -0.6 \text{ V}; E_{\text{LUMO}} = -3.9 \text{ eV}$$

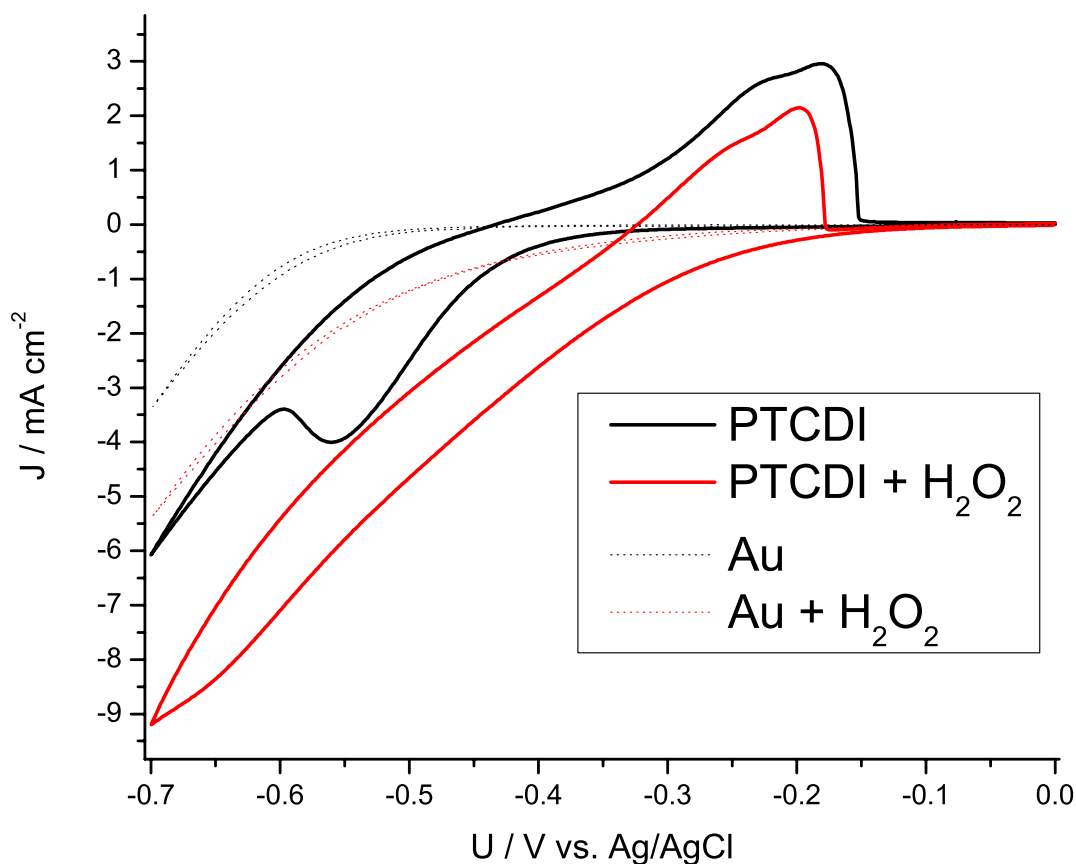

**Fig. S4.** CV of PTCDI/Au in thoroughly deoxygenated (under argon) in pH 1 electrolyte and with the addition of 0.1M  $\text{H}_2\text{O}_2$ . For reference, the measurements are compared with a bare gold electrode. The cathodic reaction on PTCDI at potentials more negative than roughly -0.4V is the hydrogen evolution reaction (black scan). This scan was cycled 10 times without any observed changes or degradation. With the addition of  $\text{H}_2\text{O}_2$ , a substantial cathodic current is observed, with a lower onset potential (red scan). Corresponding measurements on bare Au are shown in dotted lines, as a reference/control. Clearly, the further reduction of  $\text{H}_2\text{O}_2$  remains an issue with PTCDI and limits obtaining higher equilibrium  $\text{H}_2\text{O}_2$  concentrations in the galvanostatic electrolysis experiments.

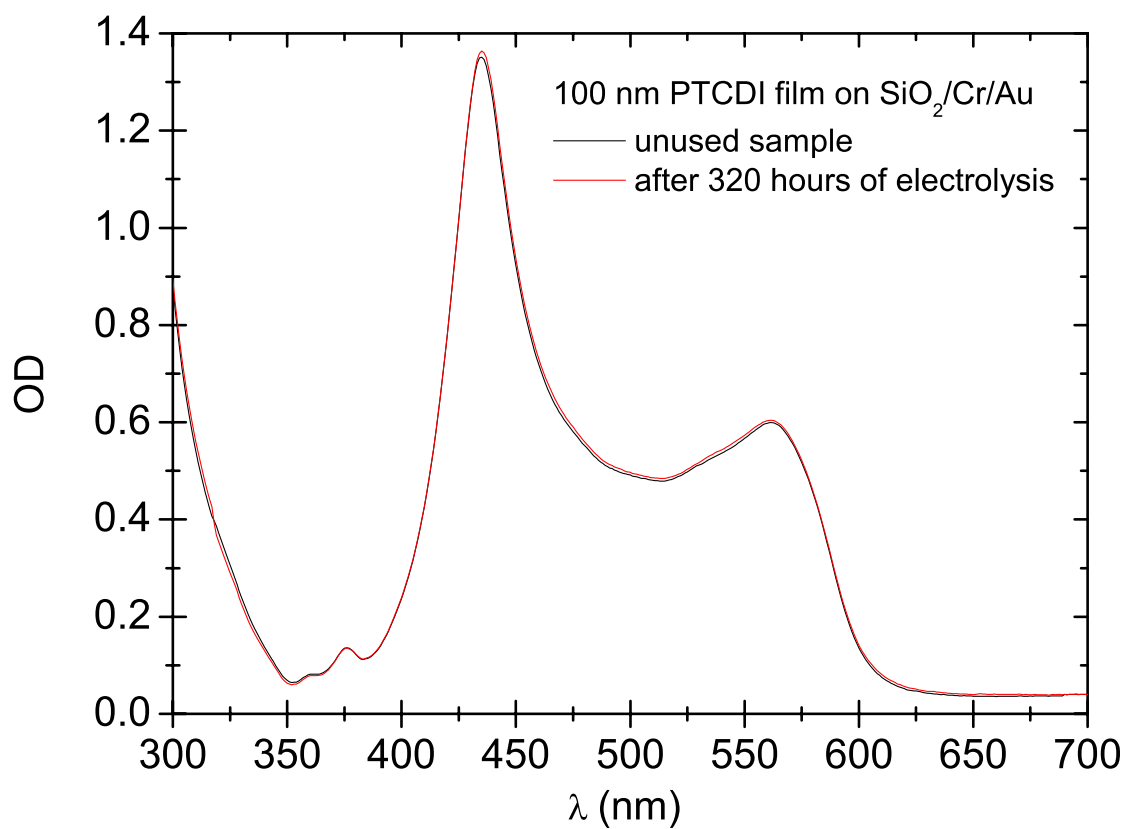

**Fig. S5.** UV-Vis reflectance measurement of a 100 nm PTCDI film on SiO<sub>2</sub>/Cr/Au before and after 320 hours of electrolysis. The lack of changes in the absorbance spectra evidences stability of the PTCDI layer.
